# Supplementary material
Source: PubMed Central journal article supplement (PMC6714034)
Supplement: jama-322-756-s001.pdf [file jama-322-756-s001.pdf]

## Supplementary Online Content

Sasson I, Hayward MD. Association between educational attainment and causes of death among white and black US adults, 2010-2017. *JAMA*. doi:10.1001/jama.2019.11330

**eTable 1.** Causes of Death Groupings by *ICD-10* Codes

**eTable 2.** Exposures and Number of Deaths by Race, Sex, Education, and Cause

**eTable 3.** Estimated Mean Number of Years of Life Lost Between Ages 25 and 84 by Cause of Death, Non-Hispanic White Men 2010-2017

**eTable 4.** Estimated Mean Number of Years of Life Lost Between Ages 25 and 84 by Cause of Death, Non-Hispanic White Women 2010-2017

**eTable 5.** Estimated Mean Number of Years of Life Lost Between Ages 25 and 84 by Cause of Death, Non-Hispanic Black Men 2010-2017

**eTable 6.** Estimated Mean Number of Years of Life Lost Between Ages 25 and 84 by Cause of Death, Non-Hispanic Black Women 2010-2017

**eTable 7.** Change in Education Gap in YLL Between High and Low Education Groups, 2010-2017

**eMethods.** Decomposition of Years of Life Lost

This supplementary material has been provided by the authors to give readers additional information about their work.

**eTable 1.** Causes of Death Groupings by *ICD-10* Codes

| <b>Cause of death</b>                                                                                                                                                      | <b><i>ICD-10</i> codes</b>                                                                                                                                                                                    |
|----------------------------------------------------------------------------------------------------------------------------------------------------------------------------|---------------------------------------------------------------------------------------------------------------------------------------------------------------------------------------------------------------|
| Circulatory diseases                                                                                                                                                       | I00–I99                                                                                                                                                                                                       |
| Cancer (excluding smoking-related)                                                                                                                                         | C16–C31, C35–C97, D00–D48                                                                                                                                                                                     |
| Smoking-related diseases (cancers of the lip, oral cavity, pharynx, esophagus, larynx, trachea, lung, and bronchus; bronchitis, emphysema, and chronic airway obstruction) | C00–C15, C32–C34, J40–J44                                                                                                                                                                                     |
| Diabetes                                                                                                                                                                   | E10–E14                                                                                                                                                                                                       |
| Drug poisoning (excluding intentional self-harm)                                                                                                                           | F11–F16, F19 Mental and behavioral disorders due to psychoactive substance use<br>X40–X44 Accidental poisoning by and exposure to drugs<br>Y10–Y14 Poisoning by and exposure to drugs, undetermined intent    |
| Alcohol abuse                                                                                                                                                              | F10 Mental and behavioral disorders due to alcohol use<br>K70 Alcoholic liver disease<br>X45 Accidental poisoning by and exposure to alcohol<br>Y15 Poisoning by and exposure to alcohol, undetermined intent |
| Suicide                                                                                                                                                                    | X60–X84 Intentional self-poisoning or self-harm<br>Y87.0 Sequelae of intentional self-harm                                                                                                                    |
| Firearm deaths (excluding intentional self-harm)                                                                                                                           | W32–W34 Accidental discharge of firearms<br>X93–X95 Assault (homicide) by discharge of firearms<br>Y22–Y24 Discharge of firearms, undetermined intent<br>Y35.0 Legal intervention involving firearm discharge |
| Other                                                                                                                                                                      | All remaining codes                                                                                                                                                                                           |

Note: Smoking-related diseases include all causes in which the smoking attributable fraction of deaths exceeds 65% in both genders combined (see main text for details).

**eTable 2.** Exposures and Number of Deaths by Race, Sex, Education, and Cause

| <b>White men</b> |                       |                    |               |                        |                 |                       |                      |                |                       |              |                     |
|------------------|-----------------------|--------------------|---------------|------------------------|-----------------|-----------------------|----------------------|----------------|-----------------------|--------------|---------------------|
| <b>Education</b> | <b>Exposures (PY)</b> | <b>Circulatory</b> | <b>Cancer</b> | <b>Smoking-related</b> | <b>Diabetes</b> | <b>Drug poisoning</b> | <b>Alcohol abuse</b> | <b>Suicide</b> | <b>Firearm deaths</b> | <b>Other</b> | <b>Total deaths</b> |
| 2010             |                       |                    |               |                        |                 |                       |                      |                |                       |              |                     |
| Low              | 30,837,828            | 195,425            | 90,006        | 101,142                | 16,234          | 10,903                | 8,203                | 13,016         | 1,420                 | 163,933      | 600,282             |
| Middle           | 15,233,235            | 52,188             | 29,769        | 24,114                 | 4,529           | 2,991                 | 2,835                | 5,018          | 363                   | 44,590       | 166,397             |
| High             | 22,063,609            | 60,317             | 38,885        | 20,585                 | 4,374           | 1,327                 | 2,158                | 4,550          | 248                   | 54,701       | 187,145             |
| Total            | 68,134,672            | 307,930            | 158,660       | 145,841                | 25,137          | 15,221                | 13,196               | 22,584         | 2,031                 | 263,224      | 953,824             |
| 2017             |                       |                    |               |                        |                 |                       |                      |                |                       |              |                     |
| Low              | 29,558,119            | 198,274            | 88,908        | 96,900                 | 18,768          | 21,966                | 10,566               | 14,533         | 1,807                 | 181,263      | 632,985             |
| Middle           | 15,914,540            | 66,697             | 36,395        | 27,757                 | 6,806           | 6,737                 | 4,154                | 6,363          | 503                   | 60,673       | 216,085             |
| High             | 25,144,188            | 76,438             | 46,209        | 21,946                 | 5,842           | 2,709                 | 3,217                | 5,436          | 268                   | 77,106       | 239,171             |
| Total            | 70,616,847            | 341,409            | 171,512       | 146,603                | 31,416          | 31,412                | 17,937               | 26,332         | 2,578                 | 319,042      | 1,088,241           |

| <b>White women</b> |                       |                    |               |                        |                 |                       |                      |                |                       |              |                     |
|--------------------|-----------------------|--------------------|---------------|------------------------|-----------------|-----------------------|----------------------|----------------|-----------------------|--------------|---------------------|
| <b>Education</b>   | <b>Exposures (PY)</b> | <b>Circulatory</b> | <b>Cancer</b> | <b>Smoking-related</b> | <b>Diabetes</b> | <b>Drug poisoning</b> | <b>Alcohol abuse</b> | <b>Suicide</b> | <b>Firearm deaths</b> | <b>Other</b> | <b>Total deaths</b> |
| 2010               |                       |                    |               |                        |                 |                       |                      |                |                       |              |                     |
| Low                | 33,241,245            | 235,786            | 99,214        | 94,029                 | 16,929          | 6,534                 | 2,877                | 3,011          | 493                   | 236,607      | 695,480             |
| Middle             | 17,318,233            | 50,627             | 31,346        | 22,005                 | 3,560           | 2,602                 | 1,199                | 1,737          | 214                   | 55,275       | 168,565             |
| High               | 22,305,450            | 36,214             | 28,423        | 12,925                 | 2,130           | 1,039                 | 855                  | 1,456          | 124                   | 41,345       | 124,511             |
| Total              | 72,864,928            | 322,627            | 158,983       | 128,959                | 22,619          | 10,175                | 4,931                | 6,204          | 831                   | 333,227      | 988,556             |
| 2017               |                       |                    |               |                        |                 |                       |                      |                |                       |              |                     |
| Low                | 29,978,045            | 221,685            | 91,438        | 93,900                 | 16,102          | 10,386                | 3,924                | 3,360          | 526                   | 256,425      | 697,746             |
| Middle             | 17,956,047            | 60,414             | 36,739        | 26,045                 | 4,843           | 4,335                 | 2,063                | 2,320          | 285                   | 73,185       | 210,229             |
| High               | 26,910,181            | 44,971             | 35,004        | 14,892                 | 2,858           | 1,583                 | 1,436                | 1,915          | 165                   | 58,469       | 161,293             |
| Total              | 74,844,273            | 327,070            | 163,181       | 134,837                | 23,803          | 16,304                | 7,423                | 7,595          | 976                   | 388,079      | 1,069,268           |

**eTable 2.** Exposures and Number of Deaths by Race, Sex, Education, and Cause (*Continued*)

| <b>Black men</b>   |                       |                    |               |                        |                 |                       |                      |                |                       |              |                     |
|--------------------|-----------------------|--------------------|---------------|------------------------|-----------------|-----------------------|----------------------|----------------|-----------------------|--------------|---------------------|
| <b>Education</b>   | <b>Exposures (PY)</b> | <b>Circulatory</b> | <b>Cancer</b> | <b>Smoking-related</b> | <b>Diabetes</b> | <b>Drug poisoning</b> | <b>Alcohol abuse</b> | <b>Suicide</b> | <b>Firearm deaths</b> | <b>Other</b> | <b>Total deaths</b> |
| 2010               |                       |                    |               |                        |                 |                       |                      |                |                       |              |                     |
| Low                | 6,468,227             | 34,670             | 16,275        | 13,067                 | 4,164           | 1,528                 | 1,210                | 847            | 2,621                 | 29,029       | 103,411             |
| Middle             | 2,617,390             | 6,651              | 3,488         | 2,016                  | 900             | 354                   | 249                  | 294            | 509                   | 5,388        | 19,849              |
| High               | 1,691,059             | 3,958              | 2,314         | 970                    | 512             | 93                    | 95                   | 177            | 96                    | 3,084        | 11,299              |
| Total              | 10,776,676            | 45,279             | 22,077        | 16,053                 | 5,576           | 1,975                 | 1,554                | 1,318          | 3,226                 | 37,501       | 134,559             |
| 2017               |                       |                    |               |                        |                 |                       |                      |                |                       |              |                     |
| Low                | 6,980,603             | 39,428             | 17,107        | 12,619                 | 5,253           | 4,932                 | 1,542                | 1,049          | 4,105                 | 33,763       | 119,798             |
| Middle             | 3,071,092             | 9,934              | 4,795         | 2,429                  | 1,473           | 1,108                 | 382                  | 464            | 790                   | 8,155        | 29,530              |
| High               | 2,308,129             | 5,606              | 3,099         | 1,069                  | 770             | 252                   | 160                  | 218            | 114                   | 4,518        | 15,806              |
| Total              | 12,359,824            | 54,968             | 25,001        | 16,117                 | 7,496           | 6,292                 | 2,084                | 1,731          | 5,009                 | 46,436       | 165,134             |
| <b>Black women</b> |                       |                    |               |                        |                 |                       |                      |                |                       |              |                     |
| <b>Education</b>   | <b>Exposures (PY)</b> | <b>Circulatory</b> | <b>Cancer</b> | <b>Smoking-related</b> | <b>Diabetes</b> | <b>Drug poisoning</b> | <b>Alcohol abuse</b> | <b>Suicide</b> | <b>Firearm deaths</b> | <b>Other</b> | <b>Total deaths</b> |
| 2010               |                       |                    |               |                        |                 |                       |                      |                |                       |              |                     |
| Low                | 6,633,031             | 35,543             | 16,168        | 8,434                  | 4,803           | 795                   | 427                  | 126            | 248                   | 31,907       | 98,451              |
| Middle             | 3,595,970             | 7,264              | 5,161         | 1,920                  | 1,100           | 307                   | 134                  | 97             | 96                    | 6,673        | 22,752              |
| High               | 2,532,915             | 4,330              | 3,268         | 966                    | 509             | 72                    | 40                   | 70             | 39                    | 4,197        | 13,491              |
| Total              | 12,761,916            | 47,137             | 24,597        | 11,320                 | 6,412           | 1,174                 | 601                  | 293            | 383                   | 42,777       | 134,694             |
| 2017               |                       |                    |               |                        |                 |                       |                      |                |                       |              |                     |
| Low                | 6,799,477             | 36,014             | 16,118        | 8,633                  | 4,940           | 1,752                 | 528                  | 215            | 341                   | 35,394       | 103,935             |
| Middle             | 4,140,847             | 10,605             | 6,954         | 2,676                  | 1,621           | 617                   | 206                  | 130            | 157                   | 10,347       | 33,313              |
| High               | 3,464,318             | 5,970              | 4,692         | 1,290                  | 723             | 126                   | 95                   | 115            | 48                    | 6,146        | 19,205              |
| Total              | 14,404,642            | 52,589             | 27,764        | 12,599                 | 7,284           | 2,495                 | 829                  | 460            | 546                   | 51,887       | 156,453             |

**eTable 3.** Estimated Mean Number of Years of Life Lost Between Ages 25 and 84 by Cause of Death, Non-Hispanic White Men 2010-2017

|                                 |             |                      |              |                       | 2010         |                       |              |                       |
|---------------------------------|-------------|----------------------|--------------|-----------------------|--------------|-----------------------|--------------|-----------------------|
| Cause of death                  | Total       | 95% CI               | Low          | 95% CI                | Mid          | 95% CI                | High         | 95% CI                |
| Circulatory                     | 2.57        | [2.56, 2.58]         | 3.18         | [3.16, 3.21]          | 2.49         | [2.46, 2.52]          | 1.61         | [1.59, 1.63]          |
| Cancer                          | 1.62        | [1.60, 1.63]         | 1.73         | [1.72, 1.75]          | 1.68         | [1.66, 1.70]          | 1.39         | [1.37, 1.41]          |
| Smoking                         | 1.45        | [1.44, 1.46]         | 1.94         | [1.92, 1.95]          | 1.31         | [1.29, 1.33]          | 0.67         | [0.66, 0.68]          |
| Diabetes                        | 0.27        | [0.26, 0.27]         | 0.34         | [0.33, 0.35]          | 0.26         | [0.26, 0.27]          | 0.15         | [0.14, 0.15]          |
| Drug poisoning                  | 0.46        | [0.45, 0.47]         | 0.76         | [0.74, 0.78]          | 0.38         | [0.37, 0.40]          | 0.12         | [0.11, 0.12]          |
| Alcohol abuse                   | 0.25        | [0.25, 0.26]         | 0.34         | [0.33, 0.35]          | 0.25         | [0.24, 0.26]          | 0.13         | [0.12, 0.13]          |
| Suicide                         | 0.54        | [0.53, 0.54]         | 0.70         | [0.69, 0.72]          | 0.54         | [0.52, 0.55]          | 0.31         | [0.30, 0.32]          |
| Firearm deaths                  | 0.06        | [0.06, 0.06]         | 0.10         | [0.09, 0.10]          | 0.04         | [0.04, 0.05]          | 0.02         | [0.02, 0.02]          |
| Other                           | 2.38        | [2.37, 2.40]         | 3.08         | [3.05, 3.10]          | 2.23         | [2.21, 2.26]          | 1.46         | [1.44, 1.47]          |
| <b>Total</b>                    | <b>9.60</b> | <b>[9.56, 9.63]</b>  | <b>12.17</b> | <b>[12.12, 12.23]</b> | <b>9.18</b>  | <b>[9.13, 9.26]</b>   | <b>5.86</b>  | <b>[5.80, 5.88]</b>   |
|                                 |             |                      |              |                       |              |                       |              |                       |
|                                 |             |                      |              |                       | 2017         |                       |              |                       |
| Cause of death                  | Total       | 95% CI               | Low          | 95% CI                | Mid          | 95% CI                | High         | 95% CI                |
| Circulatory                     | 2.49        | [2.48, 2.50]         | 3.15         | [3.13, 3.18]          | 2.56         | [2.53, 2.59]          | 1.46         | [1.44, 1.47]          |
| Cancer                          | 1.48        | [1.47, 1.49]         | 1.60         | [1.59, 1.62]          | 1.60         | [1.58, 1.62]          | 1.21         | [1.20, 1.23]          |
| Smoking                         | 1.20        | [1.20, 1.21]         | 1.68         | [1.67, 1.70]          | 1.11         | [1.09, 1.13]          | 0.50         | [0.49, 0.51]          |
| Diabetes                        | 0.30        | [0.30, 0.31]         | 0.39         | [0.38, 0.40]          | 0.33         | [0.32, 0.34]          | 0.16         | [0.15, 0.16]          |
| Drug poisoning                  | 0.98        | [0.96, 0.99]         | 1.69         | [1.66, 1.72]          | 0.91         | [0.89, 0.93]          | 0.23         | [0.22, 0.23]          |
| Alcohol abuse                   | 0.33        | [0.32, 0.33]         | 0.43         | [0.42, 0.44]          | 0.35         | [0.33, 0.36]          | 0.17         | [0.16, 0.18]          |
| Suicide                         | 0.61        | [0.60, 0.62]         | 0.83         | [0.81, 0.84]          | 0.67         | [0.65, 0.69]          | 0.33         | [0.32, 0.34]          |
| Firearm deaths                  | 0.08        | [0.07, 0.08]         | 0.14         | [0.13, 0.15]          | 0.06         | [0.05, 0.06]          | 0.02         | [0.02, 0.02]          |
| Other                           | 2.50        | [2.48, 2.51]         | 3.32         | [3.29, 3.34]          | 2.48         | [2.45, 2.51]          | 1.44         | [1.42, 1.45]          |
| <b>Total</b>                    | <b>9.97</b> | <b>[9.94, 10.00]</b> | <b>13.23</b> | <b>[13.17, 13.29]</b> | <b>10.07</b> | <b>[10.00, 10.13]</b> | <b>5.52</b>  | <b>[5.46, 5.54]</b>   |
| <b>Change from 2010 to 2017</b> |             |                      |              |                       |              |                       |              |                       |
| Cause of death                  | Total       | 95% CI               | Low          | 95% CI                | Mid          | 95% CI                | High         | 95% CI                |
| Circulatory                     | -0.08       | [-0.10, -0.06]       | -0.03        | [-0.06, 0.00]         | 0.07         | [0.03, 0.11]          | -0.15        | [-0.17, -0.12]        |
| Cancer                          | -0.14       | [-0.15, -0.12]       | -0.13        | [-0.15, -0.11]        | -0.08        | [-0.11, -0.05]        | -0.18        | [-0.20, -0.15]        |
| Smoking                         | -0.25       | [-0.26, -0.23]       | -0.26        | [-0.28, -0.23]        | -0.20        | [-0.23, -0.18]        | -0.17        | [-0.19, -0.16]        |
| Diabetes                        | 0.03        | [0.03, 0.05]         | 0.05         | [0.04, 0.06]          | 0.07         | [0.05, 0.08]          | 0.01         | [0.00, 0.02]          |
| Drug poisoning                  | 0.52        | [0.50, 0.53]         | 0.93         | [0.90, 0.96]          | 0.53         | [0.50, 0.55]          | 0.11         | [0.10, 0.12]          |
| Alcohol abuse                   | 0.08        | [0.06, 0.08]         | 0.09         | [0.07, 0.10]          | 0.10         | [0.08, 0.11]          | 0.04         | [0.03, 0.05]          |
| Suicide                         | 0.07        | [0.06, 0.09]         | 0.13         | [0.10, 0.15]          | 0.13         | [0.11, 0.16]          | 0.02         | [0.00, 0.03]          |
| Firearm deaths                  | 0.02        | [0.01, 0.02]         | 0.04         | [0.03, 0.06]          | 0.02         | [0.01, 0.02]          | 0.00         | [0.00, 0.00]          |
| Other                           | 0.12        | [0.09, 0.13]         | 0.24         | [0.20, 0.27]          | 0.25         | [0.20, 0.29]          | -0.02        | [-0.05, 0.01]         |
| <b>Total</b>                    | <b>0.37</b> | <b>[0.33, 0.42]</b>  | <b>1.06</b>  | <b>[0.99, 1.13]</b>   | <b>0.89</b>  | <b>[0.77, 0.97]</b>   | <b>-0.34</b> | <b>[-0.40, -0.29]</b> |

**eTable 4.** Estimated Mean Number of Years of Life Lost Between Ages 25 and 84 by Cause of Death, Non-Hispanic White Women 2010-2017

|                                 |             |                     |             |                     | 2010        |                     |              |                       |
|---------------------------------|-------------|---------------------|-------------|---------------------|-------------|---------------------|--------------|-----------------------|
| Cause of death                  | Total       | 95% CI              | Low         | 95% CI              | Mid         | 95% CI              | High         | 95% CI                |
| Circulatory                     | 1.43        | [1.42, 1.44]        | 1.77        | [1.76, 1.79]        | 1.34        | [1.32, 1.36]        | 0.83         | [0.81, 0.84]          |
| Cancer                          | 1.56        | [1.55, 1.57]        | 1.63        | [1.61, 1.64]        | 1.64        | [1.62, 1.66]        | 1.42         | [1.40, 1.44]          |
| Smoking                         | 1.11        | [1.10, 1.12]        | 1.40        | [1.39, 1.42]        | 1.01        | [0.99, 1.02]        | 0.53         | [0.52, 0.54]          |
| Diabetes                        | 0.18        | [0.17, 0.18]        | 0.23        | [0.23, 0.24]        | 0.16        | [0.16, 0.17]        | 0.08         | [0.08, 0.09]          |
| Drug poisoning                  | 0.28        | [0.28, 0.29]        | 0.50        | [0.49, 0.52]        | 0.28        | [0.26, 0.29]        | 0.08         | [0.07, 0.08]          |
| Alcohol abuse                   | 0.10        | [0.10, 0.10]        | 0.14        | [0.13, 0.15]        | 0.10        | [0.09, 0.10]        | 0.06         | [0.05, 0.06]          |
| Suicide                         | 0.15        | [0.15, 0.16]        | 0.19        | [0.18, 0.20]        | 0.17        | [0.16, 0.18]        | 0.11         | [0.10, 0.11]          |
| Firearm                         | 0.02        | [0.02, 0.02]        | 0.04        | [0.03, 0.04]        | 0.02        | [0.02, 0.03]        | 0.01         | [0.01, 0.01]          |
| Other                           | 1.72        | [1.71, 1.73]        | 2.19        | [2.17, 2.21]        | 1.66        | [1.64, 1.68]        | 1.09         | [1.07, 1.10]          |
| <b>Total</b>                    | <b>6.55</b> | <b>[6.54, 6.59]</b> | <b>8.09</b> | <b>[8.06, 8.14]</b> | <b>6.38</b> | <b>[6.33, 6.43]</b> | <b>4.21</b>  | <b>[4.16, 4.24]</b>   |
|                                 |             |                     |             |                     | <b>2017</b> |                     |              |                       |
| Cause of death                  | Total       | 95% CI              | Low         | 95% CI              | Mid         | 95% CI              | High         | 95% CI                |
| Circulatory                     | 1.40        | [1.39, 1.41]        | 1.84        | [1.83, 1.86]        | 1.42        | [1.40, 1.44]        | 0.76         | [0.75, 0.77]          |
| Cancer                          | 1.45        | [1.44, 1.46]        | 1.55        | [1.53, 1.57]        | 1.58        | [1.56, 1.60]        | 1.25         | [1.23, 1.26]          |
| Smoking                         | 0.98        | [0.98, 0.99]        | 1.36        | [1.35, 1.38]        | 0.91        | [0.89, 0.92]        | 0.39         | [0.38, 0.40]          |
| Diabetes                        | 0.19        | [0.19, 0.19]        | 0.27        | [0.26, 0.28]        | 0.20        | [0.19, 0.21]        | 0.09         | [0.08, 0.09]          |
| Drug poisoning                  | 0.49        | [0.48, 0.49]        | 1.00        | [0.97, 1.02]        | 0.52        | [0.50, 0.53]        | 0.11         | [0.10, 0.11]          |
| Alcohol abuse                   | 0.15        | [0.15, 0.15]        | 0.22        | [0.21, 0.23]        | 0.17        | [0.16, 0.18]        | 0.08         | [0.07, 0.08]          |
| Suicide                         | 0.19        | [0.18, 0.19]        | 0.25        | [0.24, 0.26]        | 0.24        | [0.23, 0.25]        | 0.12         | [0.11, 0.12]          |
| Firearm deaths                  | 0.03        | [0.02, 0.03]        | 0.05        | [0.04, 0.05]        | 0.03        | [0.03, 0.04]        | 0.01         | [0.01, 0.01]          |
| Other                           | 1.89        | [1.88, 1.91]        | 2.58        | [2.56, 2.61]        | 1.93        | [1.91, 1.96]        | 1.11         | [1.10, 1.13]          |
| <b>Total</b>                    | <b>6.77</b> | <b>[6.75, 6.80]</b> | <b>9.12</b> | <b>[9.08, 9.18]</b> | <b>7.00</b> | <b>[6.94, 7.05]</b> | <b>3.92</b>  | <b>[3.88, 3.94]</b>   |
| <b>Change from 2010 to 2017</b> |             |                     |             |                     |             |                     |              |                       |
| Cause of death                  | Total       | 95% CI              | Low         | 95% CI              | Mid         | 95% CI              | High         | 95% CI                |
| Circulatory                     | -0.03       | [-0.05, -0.02]      | 0.07        | [0.04, 0.10]        | 0.08        | [0.05, 0.11]        | -0.07        | [-0.09, -0.05]        |
| Cancer                          | -0.11       | [-0.12, -0.09]      | -0.08       | [-0.10, -0.05]      | -0.06       | [-0.09, -0.03]      | -0.17        | [-0.20, -0.15]        |
| Smoking                         | -0.13       | [-0.14, -0.12]      | -0.04       | [-0.06, -0.02]      | -0.10       | [-0.12, -0.07]      | -0.14        | [-0.16, -0.13]        |
| Diabetes                        | 0.01        | [0.01, 0.02]        | 0.04        | [0.02, 0.05]        | 0.04        | [0.02, 0.05]        | 0.01         | [-0.01, 0.01]         |
| Drug poisoning                  | 0.21        | [0.19, 0.21]        | 0.50        | [0.47, 0.52]        | 0.24        | [0.22, 0.26]        | 0.03         | [0.02, 0.04]          |
| Alcohol abuse                   | 0.05        | [0.05, 0.05]        | 0.08        | [0.07, 0.09]        | 0.07        | [0.06, 0.09]        | 0.02         | [0.01, 0.03]          |
| Suicide                         | 0.04        | [0.03, 0.04]        | 0.06        | [0.05, 0.08]        | 0.07        | [0.05, 0.08]        | 0.01         | [0.00, 0.02]          |
| Firearm deaths                  | 0.01        | [0.00, 0.01]        | 0.01        | [0.00, 0.02]        | 0.01        | [0.00, 0.01]        | 0.00         | [0.00, 0.00]          |
| Other                           | 0.17        | [0.16, 0.19]        | 0.39        | [0.36, 0.43]        | 0.27        | [0.24, 0.31]        | 0.02         | [0.00, 0.05]          |
| <b>Total</b>                    | <b>0.22</b> | <b>[0.18, 0.25]</b> | <b>1.03</b> | <b>[0.96, 1.09]</b> | <b>0.62</b> | <b>[0.55, 0.70]</b> | <b>-0.29</b> | <b>[-0.34, -0.24]</b> |

**eTable 5.** Estimated Mean Number of Years of Life Lost Between Ages 25 and 84 by Cause of Death, Non-Hispanic Black Men 2010-2017

|                                 |              |                       |              |                       | 2010         |                       |              |                       |
|---------------------------------|--------------|-----------------------|--------------|-----------------------|--------------|-----------------------|--------------|-----------------------|
| Cause of death                  | Total        | 95% CI                | Low          | 95% CI                | Mid          | 95% CI                | High         | 95% CI                |
| Circulatory                     | 4.10         | [4.06, 4.16]          | 4.55         | [4.49, 4.62]          | 3.53         | [3.42, 3.64]          | 2.80         | [2.69, 2.91]          |
| Cancer                          | 1.99         | [1.95, 2.02]          | 2.07         | [2.03, 2.11]          | 1.87         | [1.80, 1.95]          | 1.71         | [1.63, 1.80]          |
| Smoking                         | 1.47         | [1.45, 1.50]          | 1.71         | [1.68, 1.75]          | 1.09         | [1.04, 1.15]          | 0.71         | [0.66, 0.76]          |
| Diabetes                        | 0.54         | [0.52, 0.55]          | 0.58         | [0.56, 0.60]          | 0.50         | [0.47, 0.53]          | 0.39         | [0.36, 0.43]          |
| Drug poisoning                  | 0.28         | [0.27, 0.29]          | 0.36         | [0.34, 0.38]          | 0.21         | [0.18, 0.23]          | 0.08         | [0.06, 0.10]          |
| Alcohol abuse                   | 0.19         | [0.18, 0.20]          | 0.23         | [0.22, 0.24]          | 0.14         | [0.12, 0.16]          | 0.08         | [0.06, 0.10]          |
| Suicide                         | 0.21         | [0.20, 0.23]          | 0.23         | [0.21, 0.25]          | 0.19         | [0.17, 0.21]          | 0.18         | [0.15, 0.21]          |
| Firearm deaths                  | 0.60         | [0.58, 0.63]          | 0.85         | [0.82, 0.89]          | 0.36         | [0.32, 0.39]          | 0.11         | [0.09, 0.13]          |
| Other                           | 3.61         | [3.56, 3.65]          | 4.21         | [4.15, 4.27]          | 2.88         | [2.80, 2.98]          | 2.16         | [2.07, 2.26]          |
| <b>Total</b>                    | <b>12.99</b> | <b>[12.88, 13.10]</b> | <b>14.79</b> | <b>[14.65, 14.93]</b> | <b>10.77</b> | <b>[10.56, 10.99]</b> | <b>8.22</b>  | <b>[8.01, 8.47]</b>   |
|                                 |              |                       |              |                       |              |                       |              |                       |
|                                 |              |                       |              |                       | 2017         |                       |              |                       |
| Cause of death                  | Total        | 95% CI                | Low          | 95% CI                | Mid          | 95% CI                | High         | 95% CI                |
| Circulatory                     | 4.02         | [3.97, 4.06]          | 4.46         | [4.40, 4.53]          | 3.75         | [3.66, 3.86]          | 2.60         | [2.51, 2.70]          |
| Cancer                          | 1.79         | [1.76, 1.82]          | 1.85         | [1.81, 1.88]          | 1.78         | [1.72, 1.84]          | 1.52         | [1.46, 1.59]          |
| Smoking                         | 1.10         | [1.08, 1.12]          | 1.30         | [1.27, 1.33]          | 0.87         | [0.84, 0.91]          | 0.48         | [0.45, 0.52]          |
| Diabetes                        | 0.59         | [0.57, 0.60]          | 0.64         | [0.62, 0.67]          | 0.58         | [0.55, 0.61]          | 0.39         | [0.36, 0.42]          |
| Drug poisoning                  | 0.81         | [0.79, 0.83]          | 1.11         | [1.08, 1.15]          | 0.57         | [0.54, 0.61]          | 0.18         | [0.15, 0.20]          |
| Alcohol abuse                   | 0.21         | [0.20, 0.22]          | 0.26         | [0.24, 0.27]          | 0.17         | [0.15, 0.19]          | 0.10         | [0.08, 0.11]          |
| Suicide                         | 0.25         | [0.23, 0.26]          | 0.27         | [0.26, 0.29]          | 0.26         | [0.24, 0.28]          | 0.16         | [0.14, 0.19]          |
| Firearm deaths                  | 0.79         | [0.77, 0.82]          | 1.20         | [1.16, 1.24]          | 0.46         | [0.43, 0.50]          | 0.09         | [0.07, 0.11]          |
| Other                           | 3.59         | [3.55, 3.63]          | 4.21         | [4.15, 4.28]          | 3.16         | [3.08, 3.25]          | 2.04         | [1.97, 2.12]          |
| <b>Total</b>                    | <b>13.15</b> | <b>[13.04, 13.25]</b> | <b>15.30</b> | <b>[15.18, 15.45]</b> | <b>11.60</b> | <b>[11.42, 11.83]</b> | <b>7.56</b>  | <b>[7.38, 7.77]</b>   |
|                                 |              |                       |              |                       |              |                       |              |                       |
| <b>Change from 2010 to 2017</b> |              |                       |              |                       |              |                       |              |                       |
| Cause of death                  | Total        | 95% CI                | Low          | 95% CI                | Mid          | 95% CI                | High         | 95% CI                |
| Circulatory                     | -0.08        | [-0.16, -0.02]        | -0.09        | [-0.18, 0.00]         | 0.22         | [0.09, 0.37]          | -0.20        | [-0.33, -0.05]        |
| Cancer                          | -0.20        | [-0.24, -0.15]        | -0.22        | [-0.28, -0.17]        | -0.09        | [-0.18, 0.01]         | -0.19        | [-0.30, -0.08]        |
| Smoking                         | -0.37        | [-0.41, -0.34]        | -0.41        | [-0.46, -0.37]        | -0.22        | [-0.29, -0.15]        | -0.23        | [-0.29, -0.17]        |
| Diabetes                        | 0.05         | [0.03, 0.07]          | 0.06         | [0.04, 0.10]          | 0.08         | [0.04, 0.13]          | 0.00         | [-0.05, 0.04]         |
| Drug poisoning                  | 0.53         | [0.50, 0.55]          | 0.75         | [0.71, 0.79]          | 0.36         | [0.32, 0.41]          | 0.10         | [0.07, 0.12]          |
| Alcohol abuse                   | 0.02         | [0.01, 0.04]          | 0.03         | [0.01, 0.05]          | 0.03         | [0.01, 0.06]          | 0.02         | [-0.01, 0.04]         |
| Suicide                         | 0.04         | [0.02, 0.05]          | 0.04         | [0.02, 0.07]          | 0.07         | [0.03, 0.10]          | -0.02        | [-0.05, 0.02]         |
| Firearm deaths                  | 0.19         | [0.16, 0.22]          | 0.35         | [0.30, 0.41]          | 0.10         | [0.06, 0.15]          | -0.02        | [-0.05, 0.01]         |
| Other                           | -0.02        | [-0.09, 0.04]         | 0.00         | [-0.08, 0.10]         | 0.28         | [0.15, 0.40]          | -0.12        | [-0.24, 0.02]         |
| <b>Total</b>                    | <b>0.16</b>  | <b>[0.00, 0.30]</b>   | <b>0.51</b>  | <b>[0.33, 0.71]</b>   | <b>0.83</b>  | <b>[0.54, 1.16]</b>   | <b>-0.66</b> | <b>[-0.94, -0.36]</b> |

**eTable 6.** Estimated Mean Number of Years of Life Lost Between Ages 25 and 84 by Cause of Death, Non-Hispanic Black Women 2010-2017

|                          |              |                       |              |                      |             |                     |              |                       | 2010 |  |  |  |  |  |  |  |  |
|--------------------------|--------------|-----------------------|--------------|----------------------|-------------|---------------------|--------------|-----------------------|------|--|--|--|--|--|--|--|--|
| Cause of death           | Total        | 95% CI                | Low          | 95% CI               | Mid         | 95% CI              | High         | 95% CI                |      |  |  |  |  |  |  |  |  |
| Circulatory              | 2.69         | [2.65, 2.72]          | 3.04         | [2.99, 3.10]         | 2.52        | [2.44, 2.59]        | 1.87         | [1.80, 1.95]          |      |  |  |  |  |  |  |  |  |
| Cancer                   | 1.98         | [1.95, 2.01]          | 1.99         | [1.95, 2.04]         | 2.09        | [2.03, 2.16]        | 1.87         | [1.80, 1.95]          |      |  |  |  |  |  |  |  |  |
| Smoking                  | 0.83         | [0.81, 0.85]          | 0.94         | [0.92, 0.97]         | 0.76        | [0.73, 0.80]        | 0.53         | [0.49, 0.57]          |      |  |  |  |  |  |  |  |  |
| Diabetes                 | 0.44         | [0.43, 0.46]          | 0.51         | [0.49, 0.53]         | 0.43        | [0.41, 0.46]        | 0.26         | [0.23, 0.28]          |      |  |  |  |  |  |  |  |  |
| Drug poisoning           | 0.15         | [0.14, 0.16]          | 0.21         | [0.20, 0.23]         | 0.13        | [0.12, 0.15]        | 0.05         | [0.04, 0.06]          |      |  |  |  |  |  |  |  |  |
| Alcohol abuse            | 0.07         | [0.06, 0.08]          | 0.10         | [0.09, 0.10]         | 0.06        | [0.05, 0.07]        | 0.02         | [0.02, 0.03]          |      |  |  |  |  |  |  |  |  |
| Suicide                  | 0.04         | [0.04, 0.05]          | 0.04         | [0.03, 0.04]         | 0.05        | [0.04, 0.06]        | 0.04         | [0.03, 0.06]          |      |  |  |  |  |  |  |  |  |
| Firearm deaths           | 0.06         | [0.05, 0.07]          | 0.09         | [0.08, 0.10]         | 0.05        | [0.04, 0.06]        | 0.03         | [0.02, 0.04]          |      |  |  |  |  |  |  |  |  |
| Other                    | 2.63         | [2.59, 2.66]          | 3.12         | [3.07, 3.18]         | 2.33        | [2.26, 2.41]        | 1.80         | [1.74, 1.87]          |      |  |  |  |  |  |  |  |  |
| <b>Total</b>             | <b>8.89</b>  | <b>[8.81, 8.96]</b>   | <b>10.04</b> | <b>[9.93, 10.16]</b> | <b>8.42</b> | <b>[8.26, 8.60]</b> | <b>6.47</b>  | <b>[6.31, 6.66]</b>   |      |  |  |  |  |  |  |  |  |
|                          |              |                       |              |                      |             |                     |              |                       | 2017 |  |  |  |  |  |  |  |  |
| Cause of death           | Total        | 95% CI                | Low          | 95% CI               | Mid         | 95% CI              | High         | 95% CI                |      |  |  |  |  |  |  |  |  |
| Circulatory              | 2.54         | [2.51, 2.58]          | 2.94         | [2.89, 2.99]         | 2.53        | [2.47, 2.60]        | 1.66         | [1.60, 1.72]          |      |  |  |  |  |  |  |  |  |
| Cancer                   | 1.84         | [1.81, 1.86]          | 1.82         | [1.78, 1.86]         | 2.01        | [1.95, 2.07]        | 1.72         | [1.66, 1.78]          |      |  |  |  |  |  |  |  |  |
| Smoking                  | 0.71         | [0.70, 0.73]          | 0.84         | [0.81, 0.86]         | 0.68        | [0.65, 0.72]        | 0.40         | [0.38, 0.43]          |      |  |  |  |  |  |  |  |  |
| Diabetes                 | 0.43         | [0.42, 0.44]          | 0.51         | [0.49, 0.53]         | 0.45        | [0.42, 0.47]        | 0.24         | [0.22, 0.25]          |      |  |  |  |  |  |  |  |  |
| Drug poisoning           | 0.31         | [0.29, 0.32]          | 0.49         | [0.47, 0.52]         | 0.25        | [0.23, 0.27]        | 0.06         | [0.05, 0.07]          |      |  |  |  |  |  |  |  |  |
| Alcohol abuse            | 0.08         | [0.08, 0.09]          | 0.11         | [0.10, 0.12]         | 0.07        | [0.06, 0.08]        | 0.04         | [0.03, 0.05]          |      |  |  |  |  |  |  |  |  |
| Suicide                  | 0.06         | [0.06, 0.07]          | 0.07         | [0.06, 0.08]         | 0.06        | [0.05, 0.07]        | 0.06         | [0.05, 0.07]          |      |  |  |  |  |  |  |  |  |
| Firearm deaths           | 0.08         | [0.07, 0.09]          | 0.12         | [0.11, 0.13]         | 0.07        | [0.06, 0.08]        | 0.03         | [0.02, 0.03]          |      |  |  |  |  |  |  |  |  |
| Other                    | 2.62         | [2.59, 2.66]          | 3.16         | [3.11, 3.22]         | 2.56        | [2.49, 2.62]        | 1.66         | [1.60, 1.71]          |      |  |  |  |  |  |  |  |  |
| <b>Total</b>             | <b>8.67</b>  | <b>[8.60, 8.75]</b>   | <b>10.06</b> | <b>[9.96, 10.19]</b> | <b>8.68</b> | <b>[8.53, 8.83]</b> | <b>5.87</b>  | <b>[5.73, 5.99]</b>   |      |  |  |  |  |  |  |  |  |
| Change from 2010 to 2017 |              |                       |              |                      |             |                     |              |                       |      |  |  |  |  |  |  |  |  |
| Cause of death           | Total        | 95% CI                | Low          | 95% CI               | Mid         | 95% CI              | High         | 95% CI                |      |  |  |  |  |  |  |  |  |
| Circulatory              | -0.15        | [-0.19, -0.09]        | -0.10        | [-0.17, -0.03]       | 0.01        | [-0.08, 0.12]       | -0.21        | [-0.31, -0.13]        |      |  |  |  |  |  |  |  |  |
| Cancer                   | -0.14        | [-0.18, -0.10]        | -0.17        | [-0.23, -0.11]       | -0.08       | [-0.18, 0.00]       | -0.15        | [-0.25, -0.06]        |      |  |  |  |  |  |  |  |  |
| Smoking                  | -0.12        | [-0.14, -0.10]        | -0.10        | [-0.14, -0.07]       | -0.08       | [-0.13, -0.03]      | -0.13        | [-0.17, -0.08]        |      |  |  |  |  |  |  |  |  |
| Diabetes                 | -0.01        | [-0.03, 0.01]         | 0.00         | [-0.03, 0.03]        | 0.02        | [-0.02, 0.05]       | -0.02        | [-0.06, 0.01]         |      |  |  |  |  |  |  |  |  |
| Drug poisoning           | 0.16         | [0.14, 0.17]          | 0.28         | [0.25, 0.31]         | 0.12        | [0.09, 0.15]        | 0.01         | [0.00, 0.03]          |      |  |  |  |  |  |  |  |  |
| Alcohol abuse            | 0.01         | [0.01, 0.02]          | 0.01         | [0.00, 0.03]         | 0.01        | [0.00, 0.03]        | 0.02         | [0.01, 0.03]          |      |  |  |  |  |  |  |  |  |
| Suicide                  | 0.02         | [0.01, 0.03]          | 0.03         | [0.02, 0.05]         | 0.01        | [0.00, 0.03]        | 0.02         | [0.00, 0.03]          |      |  |  |  |  |  |  |  |  |
| Firearm deaths           | 0.02         | [0.01, 0.03]          | 0.03         | [0.01, 0.05]         | 0.02        | [0.01, 0.04]        | 0.00         | [-0.02, 0.01]         |      |  |  |  |  |  |  |  |  |
| Other                    | -0.01        | [-0.06, 0.04]         | 0.04         | [-0.05, 0.12]        | 0.23        | [0.13, 0.32]        | -0.14        | [-0.23, -0.05]        |      |  |  |  |  |  |  |  |  |
| <b>Total</b>             | <b>-0.22</b> | <b>[-0.32, -0.10]</b> | <b>0.02</b>  | <b>[-0.14, 0.19]</b> | <b>0.26</b> | <b>[0.05, 0.50]</b> | <b>-0.60</b> | <b>[-0.85, -0.41]</b> |      |  |  |  |  |  |  |  |  |



**eTable 7.** Change in Education Gap in YLL Between High and Low Education Groups, 2010-2017

| Cause of death | White men   |             |             | White women |             |             |
|----------------|-------------|-------------|-------------|-------------|-------------|-------------|
|                | Lwr 95%     | Estimate    | Upr 95%     | Lwr 95%     | Estimate    | Upr 95%     |
| Circulatory    | 0.08        | 0.12        | 0.16        | 0.10        | 0.14        | 0.17        |
| Cancer         | 0.01        | 0.04        | 0.08        | 0.06        | 0.10        | 0.13        |
| Smoking        | -0.10       | -0.08       | -0.05       | 0.07        | 0.10        | 0.12        |
| Diabetes       | 0.03        | 0.04        | 0.06        | 0.02        | 0.04        | 0.05        |
| Drug poisoning | 0.79        | 0.82        | 0.86        | 0.44        | 0.47        | 0.50        |
| Alcohol abuse  | 0.03        | 0.05        | 0.06        | 0.04        | 0.06        | 0.07        |
| Suicide        | 0.08        | 0.11        | 0.14        | 0.03        | 0.05        | 0.07        |
| Firearm deaths | 0.03        | 0.04        | 0.06        | 0.00        | 0.01        | 0.02        |
| Other          | 0.21        | 0.26        | 0.30        | 0.32        | 0.36        | 0.41        |
| <b>Total</b>   | <b>1.31</b> | <b>1.40</b> | <b>1.50</b> | <b>1.23</b> | <b>1.32</b> | <b>1.40</b> |
|                |             |             |             |             |             |             |
| Cause of death | Black men   |             |             | Black women |             |             |
|                | Lwr 95%     | Estimate    | Upr 95%     | Lwr 95%     | Estimate    | Upr 95%     |
| Circulatory    | -0.06       | 0.10        | 0.28        | -0.01       | 0.11        | 0.25        |
| Cancer         | -0.15       | -0.03       | 0.09        | -0.13       | -0.02       | 0.09        |
| Smoking        | -0.26       | -0.19       | -0.11       | -0.03       | 0.02        | 0.08        |
| Diabetes       | 0.02        | 0.07        | 0.13        | -0.02       | 0.03        | 0.07        |
| Drug poisoning | 0.61        | 0.65        | 0.70        | 0.23        | 0.27        | 0.31        |
| Alcohol abuse  | -0.02       | 0.01        | 0.04        | -0.02       | 0.00        | 0.02        |
| Suicide        | 0.02        | 0.06        | 0.10        | 0.00        | 0.02        | 0.04        |
| Firearm deaths | 0.31        | 0.37        | 0.44        | 0.01        | 0.03        | 0.06        |
| Other          | -0.04       | 0.12        | 0.27        | 0.06        | 0.19        | 0.30        |
| <b>Total</b>   | <b>0.82</b> | <b>1.18</b> | <b>1.55</b> | <b>0.38</b> | <b>0.65</b> | <b>0.91</b> |

## **eMethods.** Decomposition of Years of Life Lost

In order to estimate the number of years of life lost (YLL) to each cause of death, a decomposition method established by Andersen, Canudas-Romo, and Keiding was applied.<sup>25</sup> The method is based on the multiple-decrement life table and has several advantages: (1) it represents the absolute number of years lost in the life-table population; (2) YLL to different causes of death are additive to the total YLL; (c) competing risks need not be assumed independent.

YLL is defined based on the temporary life expectancy in a given age interval (e.g., 25–84):

$$(1) \quad YLL = {}_{60}e_{25}$$

where  $YLL$  is the expected number of life years lost from all-cause mortality between ages 25 and 84 and  ${}_{60}e_{25}$  is the temporary life expectancy in the same age interval.

Using conventional life table notation,  ${}_nL_x$  is the mean number of years lived by an individual between ages  $x$  and  $x+n$  (when the life-table radix is 1).  ${}_n\tau_x$  is defined the mean number of years lost in the same interval of length  $n$  (i.e., the complement of  ${}_nL_x$ ):

$$(2) \quad {}_n\tau_x = n - {}_nL_x$$

The mean number of years lost in the interval can then be decomposed into different causes of death, based on their cumulative incidence:

$$(3) \quad {}_n\tau_x^i = n \cdot {}_x d_{25}^i + (n \cdot l_x - {}_nL_x) \cdot \frac{{}_n d_x^i}{{}_n d_x}$$

where  ${}_n\tau_x^i$  is the mean number of years lost to cause  $i$  between age  $x$  and age  $x+n$ ,  $n$  is the length of the interval,  $l_x$  is the number of survivors to age  $x$ ,  ${}_nd_x$  is the total number of life-table deaths between age  $x$  and age  $x+n$ ,  ${}_x d_{25}^i$  is the cumulative number of deaths from cause  $i$  by age  $x$ , and  $\frac{{}_n d_x^i}{{}_nd_x}$  is the fraction of deaths from cause  $i$  in the age interval  $x+n$ .

YLL is then the sum of years lost to all causes  $i$  across all  $j$  intervals of length  $n$ :

$$(4) \quad YLL = \sum_j \sum_i {}_n\tau_x^i$$

After multiple-decrement life tables were constructed for each race-gender-education group, in 2010 and in 2017, the decomposition was applied using 9 major causes of death groupings: circulatory diseases, smoking-related diseases, cancer (excluding smoking-related), diabetes, drug poisoning, and alcohol abuse, suicide, firearm deaths, and all remaining causes of death.
